# Supplementary material for: The Impact of Social Media Use Interventions on Mental Well-Being: Systematic Review
Source: PubMed Central journal article supplement (PMC10457695; doi:10.2196/44922), 2023-08-11
Supplement: jmir_v25i1e44922_app3.pdf [file jmir_v25i1e44922_app3.pdf]

|                            | Brailovskaia et al (2020) | Brown and Kuss (2020) | Chen et al (2022) | Fioravanti et al (2020) | Graham et al (2021) | Hall et al (2019) | Hanley et al (2019) | Hou et al (2019) | Hunt et al (2018) | Hunt et al (2021) | Lambert et al (2022) | Mitev et al (2021) | Mosquera et al (2020) | O'Connell (2020) | Przybylski et al (2021) | Esmaeili Rad & Ahmadi (2018) | Thai et al (2021) | Throuvala et al (2020) | Tromholt (2016) | Turel et al (2018) | Vally & D'Souza (2019) | Vanman et al (2018) | Zhou et al (2021) |
|----------------------------|---------------------------|-----------------------|-------------------|-------------------------|---------------------|-------------------|---------------------|------------------|-------------------|-------------------|----------------------|--------------------|-----------------------|------------------|-------------------------|------------------------------|-------------------|------------------------|-----------------|--------------------|------------------------|---------------------|-------------------|
| Intervention effectiveness | ▬                         | ↑                     | ↑                 | ↕                       | ▬                   | ▬                 | ▬                   | ↑                | ↕                 | ↑                 | ↑                    | ▬                  | ↕                     | ↕                | ▬                       | ↑                            | ▬                 | ↑                      | ↑               | ↕                  | ↕                      | ↕                   | ↑                 |
| Selection bias             | M                         | M                     | W                 | M                       | M                   | M                 | M                   | M                | W                 | W                 | M                    | M                  | W                     | M                | M                       | W                            | M                 | M                      | M               | W                  | W                      | M                   | M                 |
| Study design               | W                         | M                     | S                 | W                       | S                   | S                 | W                   | W                | W                 | S                 | S                    | S                  | S                     | M                | S                       | S                            | S                 | S                      | W               | W                  | S                      | S                   | W                 |
| Confounders                | S                         | S                     | M                 | S                       | W                   | W                 | W                   | W                | W                 | W                 | S                    | W                  | M                     | W                | W                       | S                            | W                 | S                      | W               | S                  | S                      | W                   | S                 |
| Blinding                   | W                         | W                     | W                 | M                       | W                   | W                 | W                   | W                | W                 | W                 | W                    | W                  | W                     | W                | W                       | W                            | W                 | S                      | W               | W                  | W                      | W                   | W                 |
| Data collection            | S                         | W                     | W                 | W                       | S                   | W                 | M                   | W                | S                 | S                 | W                    | S                  | W                     | S                | S                       | S                            | S                 | S                      | W               | W                  | S                      | S                   | W                 |
| Withdrawals and Dropouts   | S                         | M                     | S                 | S                       | M                   | W                 | M                   | S                | W                 | W                 | S                    | M                  | S                     | S                | W                       | S                            | S                 | W                      | M               | W                  | S                      | S                   | S                 |
| <b>Global score</b>        | W                         | W                     | W                 | W                       | W                   | W                 | W                   | W                | W                 | W                 | W                    | W                  | W                     | W                | W                       | W                            | W                 | M                      | W               | W                  | W                      | W                   | W                 |

W:Weak, M:Moderate, S:Strong

▬ = no effect    ↑ = beneficial Effect    ↕ = mixed effects
